# Supplementary material for: Proteomic Profiling of Paracoccidioides brasiliensis in Response to Phenacylideneoxindol Derivative: Unveiling Molecular Targets and Pathways
Source: MDPI journal article supplement (doi:10.3390/jof9080854), 2023-08-16

**Proteomic Profiling of *Paracoccidioides brasiliensis* in Response to Phenacylideneoxindol Derivative: Unveiling Molecular Targets and Pathways**

**Supplementary Material**

**Table S1. *P. brasiliensis* proteins downregulated after incubation with OPI**

| Accession<br><i>P. brasiliensis</i><br>(Pb18) (a)                     | Protein                                       | EC<br>Number<br>(b) | Score  | Fold<br>change | TRAT:CTRL_P |
|-----------------------------------------------------------------------|-----------------------------------------------|---------------------|--------|----------------|-------------|
| <b>Metabolism</b>                                                     |                                               |                     |        |                |             |
| <i>Amino acid metabolism</i>                                          |                                               |                     |        |                |             |
| PADG_12043                                                            | cysteine mitochondrial desulfurase            | 2.8.1.7             | 648.21 | CTRL           |             |
| PADG_01963                                                            | glycine cleavage system H protein             | 2.1.2.10            | 1121.2 | CTRL           |             |
| PADG_01536                                                            | glutamine synthetase                          | 6.3.1.2             | 361.31 | CTRL           |             |
| PADG_02456                                                            | cystathionine gamma-lyase                     | 4.4.1.1             | 455.01 | CTRL           |             |
| PADG_05492                                                            | serine 3-dehydrogenase                        | 1.1.1.276           | 4170.9 | 0.7            | 0           |
| PADG_03886                                                            | lysine--tRNA ligase cytoplasmic               | 6.1.1.6             | 534.33 | CTRL           |             |
| PADG_06144                                                            | saccharopine dehydrogenase                    | 1.5.1.10            | 473.85 | CTRL           |             |
| PADG_08468                                                            | 4-hydroxyphenylpyruvate dioxygenase           | 1.13.11.27          | 2086.1 | 0.7            | 0           |
| PADG_07366                                                            | methylcrotonoyl-CoA carboxylase subunit alpha | 6.4.1.4             | 1164.5 | 0.7            | 0           |
| <i>Lipid metabolism</i>                                               |                                               |                     |        |                |             |
| PADG_05783                                                            | farnesyl pyrophosphate synthetase             | 2.5.1.10            | 2083.9 | CTRL           |             |
| PADG_03199                                                            | ergosterol biosynthesis protein Erg 28        |                     | 338.8  | CTRL           |             |
| PADG_00255                                                            | fatty acid synthase subunit beta              | 2.3.1.86            | 656.91 | CTRL           |             |
| PADG_00254                                                            | fatty acid synthase subunit alpha             | 2.3.1.86            | 557.26 | CTRL           |             |
| PADG_00546                                                            | 3-oxoacyl-acyl-carrier protein reductase      | 1.1.1.100           | 1008.2 | CTRL           |             |
| PADG_02244                                                            | acyl-CoA dehydrogenase                        | 1.3.8.1             | 522.55 | CTRL           |             |
| <i>C-compound and carbohydrate metabolism</i>                         |                                               |                     |        |                |             |
| PADG_04103                                                            | pyruvate carboxylase                          | 6.4.1.1             | 382.66 | CTRL           |             |
| PADG_03825                                                            | NAD-specific glutamate dehydrogenase          | 1.4.1.2             | 411.54 | CTRL           |             |
| PADG_05217                                                            | acetyltransferase                             | 2.3.1.5.            | 577.98 | CTRL           |             |
| <i>Nucleotide metabolism</i>                                          |                                               |                     |        |                |             |
| PADG_02246                                                            | adenosine kinase                              | 2.7.1.20            | 574.24 | CTRL           |             |
| <b>Energy</b>                                                         |                                               |                     |        |                |             |
| <i>Electron transport and membrane-associated energy conservation</i> |                                               |                     |        |                |             |
| PADG_04501                                                            | ubiquinol-cytochrome c reductase subunit 7    | 1.10.2.2            | 652.51 | CTRL           |             |

|                                                                        |                                                      |          |        |      |  |   |
|------------------------------------------------------------------------|------------------------------------------------------|----------|--------|------|--|---|
| PADG_11981                                                             | V-type proton ATPase catalytic subunit A             | 3.6.3.14 | 442.31 | CTRL |  |   |
| PADG_08394                                                             | cytochrome b-c1 complex subunit 2                    | 1.10.2.2 | 1030.1 | CTRL |  |   |
| PADG_03163                                                             | cytochrome c peroxidase. mitochondrial               | 1.11.1.5 | 4873.6 | 0.6  |  | 0 |
| PADG_07964                                                             | vacuolar ATP synthase subunit E                      | 3.6.3.14 | 724.14 | CTRL |  |   |
| <i>Tricarboxylic acid pathway</i>                                      |                                                      |          |        |      |  |   |
| PADG_02260                                                             | succinyl-CoA ligase subunit alpha                    | 6.2.1.5  | 3349.1 | 0.4  |  | 0 |
| PADG_04993                                                             | citrate synthase subunit 1                           | 2.3.3.8  | 776.32 | CTRL |  |   |
| PADG_07475                                                             | succinate dehydrogenase                              | 1.3.5.11 | 416.4  | CTRL |  |   |
| <i>Glycolysis and gluconeogenesis</i>                                  |                                                      |          |        |      |  |   |
| PADG_01896                                                             | phosphoglycerate kinase                              | 2.7.2.3  | 2512.9 | 0.7  |  | 0 |
| PADG_03631                                                             | phosphoglycerate mutase                              | 5.4.2.12 | 491.45 | CTRL |  |   |
| <b>Protein synthesis</b>                                               |                                                      |          |        |      |  |   |
| PADG_07891                                                             | ubiquitin-60S ribosomal protein L40                  |          | 2351.7 | 0.3  |  | 0 |
| PADG_01605                                                             | polyubiquitin                                        |          | 2628.7 | 0.3  |  | 0 |
| PADG_00995                                                             | ubiquitin-40S ribosomal protein S27a                 |          | 2542.1 | 0.5  |  | 0 |
| PADG_08033                                                             | eukaryotic translation initiation factor 3 subunit B |          | 506.4  | CTRL |  |   |
| PADG_00692                                                             | elongation factor 1-alpha                            |          | 7312.7 | 0.6  |  | 0 |
| PADG_08125                                                             | elongation factor 2                                  |          | 6751.1 | 0.7  |  | 0 |
| PADG_01949                                                             | translation elongation factor Tu                     |          | 9146.6 | 0.8  |  | 0 |
| <b>Biogenesis of cellular components</b>                               |                                                      |          |        |      |  |   |
| PADG_03895                                                             | dynein light chain. cytoplasmic                      |          | 5013.1 | 0.6  |  | 0 |
| PADG_00912                                                             | UDP-galactopyranose mutase                           | 5.4.99.9 | 618.57 | CTRL |  |   |
| PADG_03959                                                             | ARP2/3 actin-organizing complex subunit Sop2         |          | 428.53 | CTRL |  |   |
| <b>Cellular transport, transport facilitation and transport routes</b> |                                                      |          |        |      |  |   |
| PADG_07508                                                             | phosphatidylinositol transfer protein SFH5           |          | 1573.6 | 0.6  |  | 0 |
| <b>Cell rescue, defense and virulence</b>                              |                                                      |          |        |      |  |   |
| PADG_00324                                                             | catalase                                             | 1.11.1.6 | 5493.8 | 0.7  |  | 0 |
| <b>Cell cycle and DNA processing</b>                                   |                                                      |          |        |      |  |   |
| PADG_04810                                                             | GTP-binding nuclear protein GSP1/Ran                 |          | 3937.9 | 0.7  |  | 0 |
| PADG_05683                                                             | cell division control protein 48                     |          | 4405.6 | 0.7  |  | 0 |
| PADG_08483                                                             | heterochromatin protein HP1                          |          | 481.98 | CTRL |  |   |
| <b>Transcription</b>                                                   |                                                      |          |        |      |  |   |
| PADG_04311                                                             | cellular nucleic acid-binding protein                |          | 1550   | 0.7  |  | 0 |
| PADG_02752                                                             | 116 kDa U5 small nuclear ribonucleoprotein component |          | 418.17 | CTRL |  |   |

**Protein fate (folding, modification, destination)**

|            |                             |           |         |        |      |
|------------|-----------------------------|-----------|---------|--------|------|
| PADG_04092 | peptidyl-prolyl isomerase B | cis-trans | 5.2.1.8 | 1147.9 | CTRL |
|------------|-----------------------------|-----------|---------|--------|------|

**Unclassified**

|            |                      |  |  |        |      |   |
|------------|----------------------|--|--|--------|------|---|
| PADG_04312 | hypothetical protein |  |  | 529.74 | 0.7  | 0 |
| PADG_07274 | hypothetical protein |  |  | 958.34 | 0.8  | 0 |
| PADG_08368 | hypothetical protein |  |  | 719.16 | CTRL |   |
| PADG_08480 | hypothetical protein |  |  | 992    | CTRL |   |
| PADG_03660 | hypothetical protein |  |  | 790.74 | CTRL |   |

---

a. Functional classification based on the functional category database Munich Information Center for Protein Sequences (MIPS) and access numbers of the *P. brasiliensis* proteins available in the database ([http://www.broadinstitute.org/annotation/genome/Paracoccidioides\\_brasiliensis/MultiHome.html](http://www.broadinstitute.org/annotation/genome/Paracoccidioides_brasiliensis/MultiHome.html)).

b. Ec number. Enzyme access number available in the Brenda-enzyme database.

CTRL- identified only in the control condition.

TRAT:CTRL\_P: statistical analysis with ExpressionE informatics v.2.5.2

**Table S2. *P. brasiliensis* proteins upregulated after incubation with OPI**

| Accession<br><i>P. brasiliensis</i><br>(Pb18) (a) | Protein                                    | EC<br>Number<br>(b) | Score   | Fold<br>change | TRAT:CTRL_P |
|---------------------------------------------------|--------------------------------------------|---------------------|---------|----------------|-------------|
| <b>Metabolism</b>                                 |                                            |                     |         |                |             |
| <i>Amino acid metabolism</i>                      |                                            |                     |         |                |             |
| PADG_02914                                        | glycine cleavage system T protein          | 2.1.2.10            | 1121.61 | 1.3            | 1           |
| PADG_00210                                        | glycine dehydrogenase                      | 1.4.1.10            | 1966.59 | 1.4            | 1           |
| PADG_06671                                        | 3-isopropylmalate dehydrogenase A          | 1.1.1.85            | 539.43  | 1.3            | 1           |
| PADG_05897                                        | serine-tRNA ligase                         | 6.1.1.11            | 532.95  | TRAT           |             |
| PADG_05277                                        | serine hydroxymethyltransferase            | 2.1.2.1             | 4289.63 | 1.4            | 1           |
| PADG_08406                                        | <i>o</i> -acetylhomoserine (thiol)-lyase   | 2.5.1.49            | 5334.69 | 1.4            | 1           |
| PADG_00663                                        | homoserine dehydrogenase                   | 1.1.1.3             | 605.33  | 1.6            | 1           |
| PADG_02777                                        | threonine synthase                         | 4.2.3.1             | 594.78  | TRAT           |             |
| PADG_03859                                        | L-threonine 3-dehydrogenase                | 1.1.1.103           | 480.41  | TRAT           |             |
| PADG_01404                                        | aspartate aminotransferase                 | 2.6.1.1             | 1407.03 | 1.3            | 1           |
| PADG_08376                                        | aspartate-semialdehyde dehydrogenase       | 1.2.1.11            | 2962.97 | 1.4            | 1           |
| PADG_05085                                        | 1-pyrroline-5-carboxylate dehydrogenase    | 1.2.1.88            | 3033.52 | 1.3            | 1           |
| PADG_08466                                        | homogentisate 1,2-dioxygenase              | 1.13.11.5           | 797.35  | 1.3            | 1           |
| PADG_02214                                        | 4-aminobutyrate aminotransferase           | 2.6.1.96            | 6943.21 | 1.4            | 1           |
| PADG_03466                                        | 3-hydroxyisobutyrate dehydrogenase         | 1.1.1.31            | 7470.5  | 1.4            | 1           |
| PADG_01928                                        | S-adenosylmethionine synthase              | 2.5.1.6             | 2205.46 | 1.4            | 1           |
| PADG_04570                                        | branched-chain amino acid aminotransferase | 2.6.1.42            | 3990.02 | 1.4            | 1           |
| PADG_01328                                        | ornithine aminotransferase                 | 2.6.1.13            | 1255.02 | 1.5            | 1           |
| PADG_00402                                        | betaine aldehyde dehydrogenase             | 1.2.1.8             | 634.37  | 1.4            | 1           |
| PADG_01286                                        | homocitrate dehydrogenase                  | 1.1.1.286           | 850.26  | 1.4            | 1           |
| <i>C-compound and carbohydrate metabolism</i>     |                                            |                     |         |                |             |
| PADG_06494                                        | dihydrolipoyl dehydrogenase                | 1.8.1.4             | 3809.74 | 1.3            | 1           |
| PADG_02145                                        | glycogen phosphorylase                     | 2.4.1.1             | 909.62  | 1.5            | 1           |
| PADG_07674                                        | carbonic anhydrase                         | 4.2.1.1             | 1665.23 | 1.4            | 1           |

*Lipid metabolism*

|            |                              |         |         |     |   |
|------------|------------------------------|---------|---------|-----|---|
| PADG_06382 | acetyl-CoA acetyltransferase | 2.3.1.9 | 1846.05 | 1.3 | 1 |
|------------|------------------------------|---------|---------|-----|---|

*Nitrogen and sulfur metabolism*

|            |             |          |         |     |   |
|------------|-------------|----------|---------|-----|---|
| PADG_06490 | formamidase | 3.5.1.49 | 4314.92 | 1.5 | 1 |
|------------|-------------|----------|---------|-----|---|

*Nucleotide metabolism*

|            |                                        |           |        |     |   |
|------------|----------------------------------------|-----------|--------|-----|---|
| PADG_07585 | inosine-5'-monophosphate dehydrogenase | 1.1.1.205 | 618.56 | 1.3 | 1 |
|------------|----------------------------------------|-----------|--------|-----|---|

|            |                                  |         |         |     |   |
|------------|----------------------------------|---------|---------|-----|---|
| PADG_01100 | uracil phosphoribosyltransferase | 2.4.2.9 | 1768.93 | 1.4 | 1 |
|------------|----------------------------------|---------|---------|-----|---|

|            |                 |          |        |      |  |
|------------|-----------------|----------|--------|------|--|
| PADG_00988 | ribonuclease T2 | 3.1.27.1 | 514.48 | TRAT |  |
|------------|-----------------|----------|--------|------|--|

|            |                        |         |        |     |   |
|------------|------------------------|---------|--------|-----|---|
| PADG_04828 | adenylosuccinate lyase | 4.3.2.2 | 904.14 | 1.5 | 1 |
|------------|------------------------|---------|--------|-----|---|

*Phosphate metabolism*

|            |                           |         |         |     |   |
|------------|---------------------------|---------|---------|-----|---|
| PADG_04175 | inorganic pyrophosphatase | 3.6.1.1 | 2895.66 | 1.3 | 1 |
|------------|---------------------------|---------|---------|-----|---|

**Energy***Glycolysis and gluconeogenesis*

|            |            |         |         |     |   |
|------------|------------|---------|---------|-----|---|
| PADG_03813 | hexokinase | 2.7.1.1 | 3726.23 | 1.3 | 1 |
|------------|------------|---------|---------|-----|---|

|            |                 |          |         |     |   |
|------------|-----------------|----------|---------|-----|---|
| PADG_01278 | pyruvate kinase | 2.7.1.40 | 11269.6 | 1.3 | 1 |
|------------|-----------------|----------|---------|-----|---|

|            |                                   |          |       |     |   |
|------------|-----------------------------------|----------|-------|-----|---|
| PADG_08503 | phosphoenolpyruvate carboxykinase | 4.1.1.49 | 960.1 | 1.4 | 1 |
|------------|-----------------------------------|----------|-------|-----|---|

*Tricarboxylic acid pathway*

|            |                    |         |         |     |   |
|------------|--------------------|---------|---------|-----|---|
| PADG_08119 | fumarate hydratase | 4.2.1.2 | 1604.83 | 1.3 | 1 |
|------------|--------------------|---------|---------|-----|---|

|            |                      |          |       |     |   |
|------------|----------------------|----------|-------|-----|---|
| PADG_07210 | malate dehydrogenase | 1.1.1.37 | 28764 | 1.3 | 1 |
|------------|----------------------|----------|-------|-----|---|

|            |                                      |          |         |     |   |
|------------|--------------------------------------|----------|---------|-----|---|
| PADG_05904 | dihydrolipoamide succinyltransferase | 2.3.1.61 | 1101.68 | 1.3 | 1 |
|------------|--------------------------------------|----------|---------|-----|---|

*Glyoxylate cycle*

|            |                  |         |        |     |   |
|------------|------------------|---------|--------|-----|---|
| PADG_01483 | isocitrate lyase | 4.1.3.1 | 1955.1 | 1.3 | 1 |
|------------|------------------|---------|--------|-----|---|

*Methyl citrate cycle*

|            |                          |         |         |     |   |
|------------|--------------------------|---------|---------|-----|---|
| PADG_04710 | 2-methylcitrate synthase | 2.3.3.5 | 8409.58 | 1.3 | 1 |
|------------|--------------------------|---------|---------|-----|---|

*Fermentation*

|            |                         |         |       |     |   |
|------------|-------------------------|---------|-------|-----|---|
| PADG_11405 | alcohol dehydrogenase 1 | 1.1.1.1 | 969.2 | 1.4 | 1 |
|------------|-------------------------|---------|-------|-----|---|

*Respiration*

|            |          |  |         |     |   |
|------------|----------|--|---------|-----|---|
| PADG_06515 | suaprgal |  | 24981.7 | 1.3 | 1 |
|------------|----------|--|---------|-----|---|

*Electron transport and membrane-associated energy conservation*

|            |                                         |          |         |     |   |
|------------|-----------------------------------------|----------|---------|-----|---|
| PADG_08349 | ATP synthase subunit beta mitochondrial | 3.6.3.14 | 25661.9 | 1.3 | 1 |
|------------|-----------------------------------------|----------|---------|-----|---|

|            |                                          |          |         |      |  |
|------------|------------------------------------------|----------|---------|------|--|
| PADG_07789 | ATP synthase subunit delta mitochondrial | 3.6.3.14 | 1832.37 | TRAT |  |
|------------|------------------------------------------|----------|---------|------|--|

|            |                                      |          |         |     |   |
|------------|--------------------------------------|----------|---------|-----|---|
| PADG_04729 | ATP synthase subunit D mitochondrial | 3.6.3.14 | 2432.08 | 1.5 | 1 |
|------------|--------------------------------------|----------|---------|-----|---|

|            |                                     |         |         |     |   |
|------------|-------------------------------------|---------|---------|-----|---|
| PADG_05750 | cytochrome c oxidase polypeptide VI | 1.9.3.1 | 4605.58 | 1.5 | 1 |
|------------|-------------------------------------|---------|---------|-----|---|

|            |              |  |         |     |   |
|------------|--------------|--|---------|-----|---|
| PADG_06978 | cytochrome c |  | 2402.86 | 1.4 | 1 |
|------------|--------------|--|---------|-----|---|

|            |                                         |         |       |     |   |
|------------|-----------------------------------------|---------|-------|-----|---|
| PADG_07749 | NAD(P)H:quinone oxidoreductase. type IV | 1.6.5.2 | 61735 | 1.4 | 1 |
|------------|-----------------------------------------|---------|-------|-----|---|

|            |                                |         |        |     |   |
|------------|--------------------------------|---------|--------|-----|---|
| PADG_01366 | NADH-ubiquinone oxidoreductase | 1.6.5.2 | 871.23 | 1.4 | 1 |
|------------|--------------------------------|---------|--------|-----|---|

|                          |                                                      |          |         |     |   |
|--------------------------|------------------------------------------------------|----------|---------|-----|---|
| PADG_00688               | F-type H <sup>+</sup> -transporting ATPase subunit H | 3.6.3.14 | 2753.58 | 1.6 | 1 |
| <b>Cell fate</b>         |                                                      |          |         |     |   |
| PADG_08615               | tropomyosin-1                                        |          | 7420.29 | 1.3 | 1 |
| <b>Protein synthesis</b> |                                                      |          |         |     |   |
| PADG_08715               | ribosomal protein L28e                               |          | 8600.58 | 1.4 | 1 |
| PADG_02056               | ribosomal protein L7/L12                             |          | 8745.29 | 1.3 | 1 |
| PADG_01654               | 40S ribosomal protein S6-A                           |          | 9211.99 | 1.3 | 1 |
| PADG_00784               | 40S ribosomal protein S0                             |          | 17982.4 | 1.4 | 1 |
| PADG_03326               | 40S ribosomal protein S9                             |          | 5550.94 | 1.3 | 1 |
| PADG_03315               | 40S ribosomal protein S4                             |          | 3012.44 | 1.4 | 1 |
| PADG_00333               | 40S ribosomal protein S16                            |          | 5431.62 | 1.4 | 1 |
| PADG_00354               | 40S ribosomal protein S17                            |          | 6613.62 | 1.4 | 1 |
| PADG_02445               | 40S ribosomal protein S15                            |          | 30663.5 | 1.4 | 1 |
| PADG_08602               | 40S ribosomal protein S2                             |          | 10459.7 | 1.4 | 1 |
| PADG_07685               | 40S ribosomal protein                                |          | 4007.36 | 1.4 | 1 |
| PADG_06838               | 40S ribosomal protein S5                             |          | 7030.37 | 1.4 | 1 |
| PADG_00942               | 40S ribosomal protein S7                             |          | 17451.1 | 1.4 | 1 |
| PADG_06680               | 40S ribosomal protein S22                            |          | 6891.2  | 1.6 | 1 |
| PADG_12365               | 40S ribosomal protein S8-A                           |          | 2025.18 | 1.4 | 1 |
| PADG_01407               | 40S ribosomal protein                                |          | 7203.81 | 1.3 | 1 |
| PADG_11379               | 60S ribosomal protein L5                             |          | 5854.33 | 1.3 | 1 |
| PADG_00514               | 60S ribosomal protein L16                            |          | 2428.02 | 1.3 | 1 |
| PADG_02828               | 60S ribosomal protein L10a                           |          | 2307.15 | 1.3 | 1 |
| PADG_04588               | 60S ribosomal protein L22                            |          | 8081.96 | 1.3 | 1 |
| PADG_05939               | 60S ribosomal protein L27a                           |          | 1335.61 | 1.4 | 1 |
| PADG_00612               | 60S ribosomal protein L27-A                          |          | 3385.56 | 1.4 | 1 |
| PADG_06726               | 60S ribosomal protein L17                            |          | 2076.97 | 1.5 | 1 |
| PADG_03781               | 60S ribosomal protein L30                            |          | 3182.43 | 1.4 | 1 |
| PADG_03325               | 60S ribosomal protein L21-A                          |          | 11439   | 1.4 | 1 |
| PADG_04848               | 60S ribosomal protein L8-B                           |          | 1887.85 | 1.4 | 1 |
| PADG_04449               | 60S ribosomal protein L23                            |          | 3782.12 | 1.5 | 1 |
| PADG_05883               | 60S ribosomal protein L25                            |          | 15591.8 | 1.5 | 1 |
| PADG_07924               | 60S ribosomal protein L24                            |          | 681.22  | 1.5 | 1 |
| PADG_03873               | 60S ribosomal protein L20                            |          | 3445.41 | 1.5 | 1 |
| PADG_03856               | 60S ribosomal protein L15                            |          | 3750.28 | 1.4 | 1 |
| PADG_03778               | 60S ribosomal protein L10-A                          |          | 5593.24 | 1.5 | 1 |
| PADG_04106               | 60S ribosomal protein L11                            |          | 1323.36 | 1.5 | 1 |
| PADG_02249               | 60S ribosomal protein L2                             |          | 3203.24 | 1.5 | 1 |
| PADG_05338               | 60S ribosomal protein L18-B                          |          | 4233.38 | 1.5 | 1 |
| PADG_01083               | 60S ribosomal protein L32                            |          | 1552.35 | 1.5 | 1 |
| PADG_01387               | 60S ribosomal protein L7                             |          | 1916.87 | 1.6 | 1 |
| PADG_11832               | 60S ribosomal protein L31                            |          | 2077.8  | 1.6 | 1 |
| PADG_05721               | 60S ribosomal protein L4-A                           |          | 5906.33 | 1.5 | 1 |

|                                                          |                                                              |           |         |      |   |
|----------------------------------------------------------|--------------------------------------------------------------|-----------|---------|------|---|
| PADG_04402                                               | 60S ribosomal protein L34-A                                  |           | 2147.49 | TRAT |   |
| PADG_08244                                               | 60S acidic ribosomal protein P1                              |           | 19823.1 | 1.3  | 1 |
| PADG_06110                                               | translation initiation factor SUI1                           |           | 5317.54 | 1.5  | 1 |
| PADG_04057                                               | translation initiation factor 3 subunit                      |           | 2275.88 | 1.4  | 1 |
| PADG_11904                                               | translational activator                                      |           | 551.15  | 1.5  | 1 |
| PADG_07803                                               | protein transporter SEC23                                    |           | 6462.38 | 1.3  | 1 |
| PADG_01530                                               | guanine nucleotide-binding protein subunit beta-like protein |           | 4123.37 | 1.3  | 1 |
| <b>Protein fate (folding, modification, destination)</b> |                                                              |           |         |      |   |
| PADG_03221                                               | thimet oligopeptidase                                        |           | 1082.29 | 1.4  | 1 |
| PADG_06992                                               | mitochondrial co-chaperone Grp                               |           | 4746.56 | 1.6  | 1 |
| PADG_12323                                               | peptidyl-prolyl cis-trans isomerase                          | 5.2.1.8   | 1332.36 | 1.4  | 1 |
| <b>Cellular communication/signal transduction</b>        |                                                              |           |         |      |   |
| PADG_02017                                               | calmodulin                                                   |           | 13307   | 1.3  | 1 |
| PADG_05517                                               | rho GDP-dissociation inhibitor                               |           | 997.58  | TRAT |   |
| <b>Cell cycle and DNA processing</b>                     |                                                              |           |         |      |   |
| PADG_01032                                               | DNA-binding protein 42 kDa                                   |           | 544.02  | 1.3  | 1 |
| PADG_05906                                               | histone H2A                                                  |           | 485.87  | TRAT |   |
| <b>Transcription</b>                                     |                                                              |           |         |      |   |
| PADG_02555                                               | nucleic acid-binding protein                                 |           | 2568.2  | 1.4  | 1 |
| PADG_03696                                               | nuclear polyadenylated RNA-binding protein Nab2              |           | 772.17  | 1.4  | 1 |
| <b>Biogenesis of cellular components</b>                 |                                                              |           |         |      |   |
| PADG_04761                                               | mannosyl-oligosaccharide glucosidase                         | 3.2.1.106 | 618.03  | 1.5  | 1 |
| <b>Cell Rescue, Defense and virulence</b>                |                                                              |           |         |      |   |
| PADG_01711                                               | Hsp90 co-chaperone AHA1                                      |           | 701.31  | TRAT |   |
| PADG_01954                                               | superoxide dismutase                                         | 1.15.1.1  | 2101.82 | 1.4  | 1 |
| <b>Unclassified</b>                                      |                                                              |           |         |      |   |
| PADG_08270                                               | hypothetical protein                                         |           | 904.53  | 1.3  | 1 |
| PADG_07064                                               | hypothetical protein                                         |           | 928.74  | 1.3  | 1 |
| PADG_02338                                               | hypothetical protein                                         |           | 780.78  | 4.1  | 1 |
| PADG_03654                                               | hypothetical protein                                         |           | 1385.83 | TRAT |   |
| PADG_01900                                               | hypothetical protein                                         |           | 812.3   | TRAT |   |
| PADG_08152                                               | hypothetical protein                                         |           | 2935.69 | TRAT |   |
| PADG_01773                                               | hypothetical protein                                         |           | 685.72  | TRAT |   |
| PADG_04389                                               | hypothetical protein                                         |           | 687.61  | TRAT |   |
| PADG_00541                                               | hypothetical protein                                         |           | 1892.82 | TRAT |   |
| PADG_03210                                               | hypothetical protein                                         |           | 2911.28 | 1.7  | 1 |

|            |                      |         |      |   |
|------------|----------------------|---------|------|---|
| PADG_05034 | hypothetical protein | 1240.88 | 1.4  | 1 |
| PADG_05703 | hypothetical protein | 3286.77 | 1.4  | 1 |
| PADG_02764 | hypothetical protein | 1358.94 | 1.5  | 1 |
| PADG_11227 | hypothetical protein | 992.21  | 1.4  | 1 |
| PADG_11950 | hypothetical protein | 2730.66 | 1.3  | 1 |
| PADG_02343 | hypothetical protein | 1200.84 | 1.4  | 1 |
| PADG_02981 | hypothetical protein | 8121.04 | 2.3  | 1 |
| PADG_08724 | hypothetical protein | 1946.17 | TRAT |   |
| PADG_11865 | hypothetical protein | 388.26  | 1.5  | 1 |

---

a. Functional classification based on the functional category database Munich Information Center for Protein Sequences (MIPS) and access numbers of the *P. brasiliensis* proteins available in the database ([http://www.broadinstitute.org/annotation/genome/Paracoccidioides\\_brasiliensis/MultiHome.html](http://www.broadinstitute.org/annotation/genome/Paracoccidioides_brasiliensis/MultiHome.html)).

b. Ec number. Enzyme access number available in the Brenda-enzyme database.

TRAT- identified only in the treated condition.

TRAT:CTRL\_P: statistical analysis with ExpressionE informatics v.2.5.2



**Table S3. Proteins that were not differentially expressed considering a fold change of 1.3**

| <b>Accession Number</b> | <b>Protein</b>                                                    | <b>Score</b> | <b>Fold change</b> |
|-------------------------|-------------------------------------------------------------------|--------------|--------------------|
| PADG_07884              | polyadenylate-binding protein. cytoplasmic and nuclear            | 885.63       | 0.77               |
| PADG_04439              | hypothetical protein                                              | 4590.35      | 0.77               |
| PADG_00694              | hypothetical protein                                              | 567.51       | 0.77               |
| PADG_06568              | hypothetical protein                                              | 16108.55     | 0.79               |
| PADG_04374              | hypothetical protein                                              | 1832.5       | 0.79               |
| PADG_05837              | E3 ubiquitin ligase complex SCF subunit sconC                     | 4456.05      | 0.81               |
| PADG_12077              | actin                                                             | 789.67       | 0.81               |
| PADG_03983              | 6.7-dimethyl-8-ribityllumazine synthase                           | 603.74       | 0.82               |
| PADG_07715              | hsp90-like protein                                                | 3039.57      | 0.82               |
| PADG_06740              | hypothetical protein                                              | 11486.47     | 0.83               |
| PADG_05032              | hypothetical protein                                              | 6046.13      | 0.85               |
| PADG_06265              | hypothetical protein                                              | 7192.99      | 0.86               |
| PADG_04056              | 14-3-3 family protein epsilon                                     | 4295.13      | 0.86               |
| PADG_07213              | pyruvate dehydrogenase complex dihydrolipoamide acetyltransferase | 6996.61      | 0.87               |
| PADG_03602              | hypothetical protein                                              | 755.69       | 0.89               |
| PADG_03118              | hypothetical protein                                              | 4489.61      | 0.89               |
| PADG_00001              | peptidyl-prolyl cis-trans isomerase H                             | 1895.71      | 0.90               |
| PADG_07460              | hypothetical protein                                              | 450.34       | 0.90               |
| PADG_02048              | hypothetical protein                                              | 959.86       | 0.91               |
| PADG_00872              | histone                                                           | 2696.73      | 0.91               |
| PADG_02683              | UV excision repair protein Rad23                                  | 873.89       | 0.92               |
| PADG_06876              | hypothetical protein                                              | 2816.15      | 0.93               |
| PADG_03651              | 6-phosphogluconate dehydrogenase. decarboxylating 1               | 1147.18      | 0.94               |
| PADG_00446              | hypothetical protein                                              | 2124         | 0.94               |
| PADG_04709              | methyl-isocitrate lyase                                           | 481.54       | 0.95               |
| PADG_04559              | hypothetical protein                                              | 2655.86      | 0.95               |
| PADG_04440              | hypothetical protein                                              | 19787.8      | 0.95               |
| PADG_05504              | thioredoxin                                                       | 7773.85      | 0.95               |
| PADG_00067              | hypothetical protein                                              | 542.84       | 0.95               |

|            |                                                                          |          |      |
|------------|--------------------------------------------------------------------------|----------|------|
| PADG_03176 | hypothetical protein                                                     | 1154.4   | 0.96 |
| PADG_02063 | pyruvate dehydrogenase (acetyl-transferring) E1 component. alpha subunit | 1144.22  | 0.97 |
| PADG_05907 | histone H2B                                                              | 2186.32  | 0.97 |
| PADG_03963 | hypothetical protein                                                     | 12996.71 | 0.98 |
| PADG_11468 | hypothetical protein                                                     | 879.4    | 0.99 |
| PADG_06033 | hypothetical protein                                                     | 1200.62  | 0.99 |
| PADG_00714 | pyruvate decarboxylase                                                   | 5441.92  | 1    |
| PADG_02896 | hypothetical protein                                                     | 14319.67 | 1.01 |
| PADG_07023 | hypothetical protein                                                     | 1307.38  | 1.02 |
| PADG_00451 | glucose-6-phosphate isomerase                                            | 2802.51  | 1.02 |
| PADG_03073 | nuclear movement protein nudC                                            | 3925.42  | 1.02 |
| PADG_06313 | 40S ribosomal protein S18                                                | 6023.22  | 1.02 |
| PADG_00246 | hypothetical protein                                                     | 5879.92  | 1.02 |
| PADG_03403 | hypothetical protein                                                     | 929.09   | 1.03 |
| PADG_07627 | hypothetical protein                                                     | 1990.57  | 1.04 |
| PADG_02592 | hypothetical protein                                                     | 5277.75  | 1.04 |
| PADG_01427 | 40S ribosomal protein S12                                                | 2464.37  | 1.05 |
| PADG_02751 | hypothetical protein                                                     | 3567.94  | 1.05 |
| PADG_04657 | nascent polypeptide-associated complex subunit beta                      | 4461.65  | 1.06 |
| PADG_07420 | transaldolase                                                            | 7526.31  | 1.06 |
| PADG_06165 | hypothetical protein                                                     | 337.09   | 1.06 |
| PADG_03967 | hypothetical protein                                                     | 4626.93  | 1.07 |
| PADG_07946 | hypothetical protein                                                     | 1528.69  | 1.07 |
| PADG_07014 | hypothetical protein                                                     | 666.02   | 1.08 |
| PADG_06429 | ketol-acid reductoisomerase. mitochondrial                               | 2013.72  | 1.09 |
| PADG_00171 | hypothetical protein                                                     | 1650.2   | 1.09 |
| PADG_07435 | hypothetical protein                                                     | 2020.88  | 1.09 |
| PADG_05822 | pyridoxine biosynthesis protein pyroA                                    | 3431.83  | 1.10 |
| PADG_08118 | hsp72-like protein                                                       | 45613.76 | 1.10 |
| PADG_00615 | hypothetical protein                                                     | 2109.09  | 1.10 |
| PADG_06048 | 40S ribosomal protein S27                                                | 5422.03  | 1.10 |
| PADG_01363 | hypothetical protein                                                     | 3205.7   | 1.10 |
| PADG_03522 | methylthioadenosine phosphorylase                                        | 702.62   | 1.10 |
| PADG_01486 | hypothetical protein                                                     | 1916.53  | 1.11 |
| PADG_01914 | 60S ribosomal protein L35                                                | 1816.06  | 1.11 |
| PADG_07081 | hypothetical protein                                                     | 4857.25  | 1.11 |
| PADG_00443 | dihydropteroate synthase                                                 | 2502.89  | 1.11 |

|            |                                                                  |          |      |
|------------|------------------------------------------------------------------|----------|------|
| PADG_08369 | hsp60-like protein                                               | 41789.88 | 1.11 |
| PADG_05109 | 2.3-bisphosphoglycerate-independent phosphoglycerate mutase      | 1614.42  | 1.12 |
| PADG_01564 | methyilmalonate-semialdehyde dehydrogenase (acylating)           | 3545.25  | 1.12 |
| PADG_04687 | hypothetical protein                                             | 1114.11  | 1.12 |
| PADG_02446 | 60S acidic ribosomal protein P2                                  | 8778.9   | 1.12 |
| PADG_01621 | hypothetical protein                                             | 7546.76  | 1.12 |
| PADG_11845 | aconitate hydratase. mitochondrial                               | 4217.13  | 1.12 |
| PADG_02030 | hypothetical protein                                             | 4687.51  | 1.13 |
| PADG_02761 | hsp75-like protein                                               | 4000.97  | 1.13 |
| PADG_06488 | hypothetical protein                                             | 13316.72 | 1.13 |
| PADG_03194 | hypothetical protein                                             | 1284.01  | 1.15 |
| PADG_04702 | malate synthase. glyoxysomal                                     | 1784.29  | 1.15 |
| PADG_04076 | hypothetical protein                                             | 2362.57  | 1.15 |
| PADG_01228 | hypothetical protein                                             | 1860.56  | 1.15 |
| PADG_01551 | thioredoxin reductase                                            | 704.65   | 1.15 |
| PADG_02967 | hypothetical protein                                             | 1082.05  | 1.15 |
| PADG_02733 | hypothetical protein                                             | 865.48   | 1.15 |
| PADG_01718 | saccharopine dehydrogenase [NADP+, L-glutamate-forming] (451 aa) | 725.39   | 1.16 |
| PADG_04067 | proteasome component PUP3                                        | 1576.81  | 1.16 |
| PADG_03841 | protein disulfide-isomerase domain                               | 8600.23  | 1.16 |
| PADG_06182 | hypothetical protein                                             | 398.86   | 1.16 |
| PADG_04288 | hypothetical protein                                             | 37903.7  | 1.17 |
| PADG_07370 | hypothetical protein                                             | 1387.63  | 1.17 |
| PADG_04379 | hypothetical protein                                             | 8220.83  | 1.17 |
| PADG_01886 | adenosylhomocysteinase                                           | 2562.42  | 1.17 |
| PADG_04167 | hypothetical protein                                             | 641.23   | 1.17 |
| PADG_07249 | hypothetical protein                                             | 1121.98  | 1.17 |
| PADG_02833 | ADP-ribosylation factor                                          | 1627.49  | 1.18 |
| PADG_05111 | serine hydroxymethyltransferase. cytosolic                       | 3032.21  | 1.18 |
| PADG_01558 | hypothetical protein                                             | 931.55   | 1.18 |
| PADG_11679 | proliferating cell nuclear antigen (pcna)                        | 2504.93  | 1.19 |
| PADG_00331 | uricase                                                          | 558.91   | 1.19 |
| PADG_08465 | fumarylacetoacetase                                              | 2722.05  | 1.19 |
| PADG_05922 | hypothetical protein                                             | 3468.32  | 1.19 |
| PADG_02637 | hypothetical protein                                             | 1818.95  | 1.19 |
| PADG_00430 | hsp7-like protein                                                | 15369.86 | 1.19 |

|            |                                                                              |          |      |
|------------|------------------------------------------------------------------------------|----------|------|
| PADG_01372 | mannitol-1-phosphate 5-dehydrogenase                                         | 5035.63  | 1.19 |
| PADG_04718 | 2-methylcitrate dehydratase                                                  | 18552.45 | 1.20 |
| PADG_08604 | ATP phosphoribosyltransferase                                                | 398.66   | 1.20 |
| PADG_02625 | hypothetical protein                                                         | 861.38   | 1.20 |
| PADG_04603 | spermidine synthase                                                          | 753.68   | 1.20 |
| PADG_02785 | hypothetical protein                                                         | 15005.18 | 1.20 |
| PADG_02759 | hypothetical protein                                                         | 6292.38  | 1.20 |
| PADG_02728 | hypothetical protein                                                         | 1180.75  | 1.20 |
| PADG_05523 | hypothetical protein                                                         | 1418.88  | 1.20 |
| PADG_05025 | ribosomal protein L24                                                        | 2528.57  | 1.22 |
|            |                                                                              |          |      |
| PADG_12426 | 1.4-alpha-glucan-branching enzyme                                            | 1394.58  | 1.22 |
| PADG_02888 | hypothetical protein                                                         | 6092.82  | 1.22 |
| PADG_08464 | maleylacetoacetate isomerase                                                 | 1597.59  | 1.22 |
| PADG_00183 | hypothetical protein                                                         | 2250.59  | 1.22 |
| PADG_02652 | hypothetical protein                                                         | 18057.45 | 1.22 |
| PADG_02183 | hypothetical protein                                                         | 1038.17  | 1.22 |
|            |                                                                              |          |      |
| PADG_07953 | peptidyl-prolyl cis-trans isomerase-like 1                                   | 10047.4  | 1.22 |
| PADG_06502 | 40S ribosomal protein S20                                                    | 2053.34  | 1.22 |
| PADG_11413 | hypothetical protein                                                         | 4183.77  | 1.22 |
| PADG_02484 | valine-tRNA ligase                                                           | 609.7    | 1.22 |
| PADG_04636 | hypothetical protein                                                         | 4936.58  | 1.22 |
| PADG_07369 | hypothetical protein                                                         | 5310.21  | 1.23 |
| PADG_01867 | hypothetical protein                                                         | 1253.83  | 1.23 |
|            |                                                                              |          |      |
| PADG_02411 | glyceraldehyde-3-phosphate dehydrogenase                                     | 36468.04 | 1.23 |
| PADG_05587 | hypothetical protein                                                         | 649.68   | 1.23 |
| PADG_04939 | hypothetical protein                                                         | 1879.78  | 1.23 |
| PADG_01687 | hypothetical protein                                                         | 11191.74 | 1.23 |
| PADG_03020 | hypothetical protein                                                         | 731.32   | 1.23 |
| PADG_02735 | proteasome component PRE6                                                    | 1212.33  | 1.23 |
|            |                                                                              |          |      |
| PADG_04730 | nascent polypeptide-associated complex subunit alpha                         | 1976.8   | 1.24 |
| PADG_07813 | ATP synthase F1. gamma subunit                                               | 8105.43  | 1.24 |
|            |                                                                              |          |      |
| PADG_04099 | phosphoribosylaminoimidazolecarboxamide formyltransferase/IMP cyclohydrolase | 4942.01  | 1.24 |
| PADG_11132 | phosphoglucomutase                                                           | 1049.48  | 1.24 |
| PADG_01209 | hypothetical protein                                                         | 10077.34 | 1.24 |
| PADG_07606 | hypothetical protein                                                         | 3994.21  | 1.24 |
| PADG_00734 | urea carboxylase                                                             | 433.01   | 1.24 |

|            |                                                                  |          |      |
|------------|------------------------------------------------------------------|----------|------|
| PADG_08387 | citrate synthase. mitochondrial                                  | 4962.74  | 1.24 |
| PADG_06997 | hypothetical protein                                             | 2058.65  | 1.24 |
| PADG_06906 | triosephosphate isomerase                                        | 8002.14  | 1.25 |
| PADG_00824 | hypothetical protein                                             | 1699.66  | 1.25 |
| PADG_07524 | nucleoside diphosphate kinase                                    | 32664.7  | 1.25 |
| PADG_06766 | mitochondrial-processing peptidase subunit beta                  | 1423.17  | 1.25 |
| PADG_00335 | 40S ribosomal protein S14                                        | 6224.66  | 1.25 |
| PADG_00668 | fructose-bisphosphate aldolase 1                                 | 15783.66 | 1.25 |
| PADG_06599 | 40S ribosomal protein S25                                        | 2152.11  | 1.25 |
| PADG_06525 | 40S ribosomal protein S1                                         | 5119.54  | 1.25 |
| PADG_00422 | hypothetical protein                                             | 643.53   | 1.25 |
| PADG_08054 | malate dehydrogenase. NAD-dependent                              | 8786.75  | 1.25 |
| PADG_05081 | aldehyde dehydrogenase                                           | 10549.69 | 1.25 |
| PADG_00060 | hypothetical protein                                             | 755.97   | 1.25 |
| PADG_00849 | hypothetical protein                                             | 786.21   | 1.27 |
| PADG_12253 | 60S ribosomal protein L3                                         | 4213.76  | 1.27 |
| PADG_01267 | 40S ribosomal protein S11                                        | 3346.82  | 1.27 |
| PADG_03276 | S-(hydroxymethyl)glutathione dehydrogenase                       | 1096.19  | 1.27 |
| PADG_04315 | hypothetical protein                                             | 2642.68  | 1.27 |
| PADG_04165 | hypothetical protein                                             | 1004.75  | 1.27 |
| PADG_03686 | hypothetical protein                                             | 563.95   | 1.27 |
| PADG_02561 | ATP synthase subunit alpha. mitochondrial                        | 18216.72 | 1.28 |
| PADG_08605 | 40S ribosomal protein S28                                        | 16022.18 | 1.28 |
| PADG_01762 | oxoglutarate dehydrogenase (succinyl-transferring). E1 component | 685.2    | 1.28 |
| PADG_01755 | hypothetical protein                                             | 1413.37  | 1.28 |
| PADG_00656 | non-histone chromosomal protein 6                                | 8808.26  | 1.28 |
| PADG_05160 | hypothetical protein                                             | 567.81   | 1.28 |
| PADG_04059 | enolase                                                          | 44398.99 | 1.28 |
| PADG_06546 | hypothetical protein                                             | 808.86   | 1.28 |
| PADG_05798 | hypothetical protein                                             | 8506.6   | 1.28 |
| PADG_12025 | hypothetical protein                                             | 413.78   | 1.28 |
| PADG_03203 | hypothetical protein                                             | 789.03   | 1.28 |
| PADG_03562 | chaperone DnaK                                                   | 6243.46  | 1.28 |
| PADG_06805 | hypothetical protein                                             | 5433.17  | 1.28 |
| PADG_06319 | glutamate decarboxylase                                          | 621.88   | 1.28 |

|            |                                                                             |          |      |
|------------|-----------------------------------------------------------------------------|----------|------|
| PADG_08013 | succinate dehydrogenase [ubiquinone]<br>iron-sulfur subunit. mitochondrial  | 1079.23  | 1.28 |
| PADG_04249 | isocitrate dehydrogenase [NADP].<br>mitochondrial                           | 2835.57  | 1.29 |
| PADG_02825 | hypothetical protein                                                        | 532.65   | 1.29 |
| PADG_01706 | hypothetical protein                                                        | 2061.44  | 1.29 |
| PADG_05947 | nicotinate-nucleotide diphosphorylase<br>(carboxylating)                    | 2977.39  | 1.29 |
| PADG_08238 | 40S ribosomal protein S26E                                                  | 1470.93  | 1.29 |
| PADG_07422 | hypothetical protein                                                        | 751.24   | 1.29 |
| PADG_07782 | deoxyuridine 5'-triphosphate<br>nucleotidohydrolase                         | 10921.27 | 1.29 |
| PADG_04604 | transketolase                                                               | 1840.39  | 1.29 |
| PADG_08328 | 5-methyltetrahydropteroyltriglutamate-<br>homocysteine S-methyltransferase  | 4767.2   | 1.29 |
| PADG_00052 | succinate dehydrogenase [ubiquinone]<br>flavoprotein subunit. mitochondrial | 1905.65  | 1.29 |

**Table S4. Protein related with Defense and virulence ROS, Membrane cell and Fermentation process**

| Accession<br><i>P. brasiliensis</i><br>(Pb18) (a) | Protein                                   | EC<br>Number<br>(b) | Score   | Fold<br>change | TRAT:CTRL_P |
|---------------------------------------------------|-------------------------------------------|---------------------|---------|----------------|-------------|
| <b><i>Defense and virulence ROS</i></b>           |                                           |                     |         |                |             |
| PADG_01954                                        | superoxide dismutase                      | 1.15.1.1            | 2101.82 | 1.4            | 1           |
| PADG_00324                                        | catalase                                  | 1.11.1.6            | 5493.8  | 0.7            | 0           |
| <b><i>Membrane cell</i></b>                       |                                           |                     |         |                |             |
| PADG_03199                                        | ergosterol biosynthesis<br>protein Erg 28 |                     | 338.8   | CTRL           |             |
| <b><i>Fermentation</i></b>                        |                                           |                     |         |                |             |
| PADG_11405                                        | alcohol dehydrogenase 1                   | 1.1.1.1             | 969.2   | 1.4            | 1           |

**Figure S1. SDS-PAGE gel to assess the integrity of the proteins**

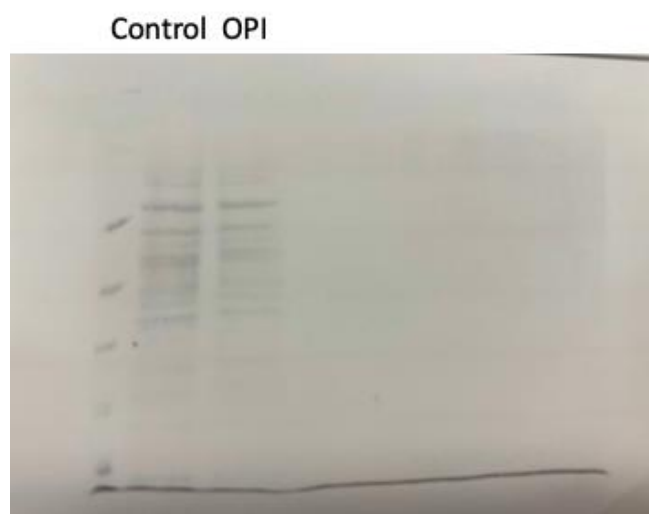

Supplement: s1 [file s1]
